# Supplementary material
Source: PubMed Central journal article supplement (PMC9381121)
Supplement: cir-21-0804_supplementary_figures_suppsf1-sf6.pdf [file cir-21-0804_supplementary_figures_suppsf1-sf6.pdf]

# SUPPLEMENTARY FIGURE LEGENDS

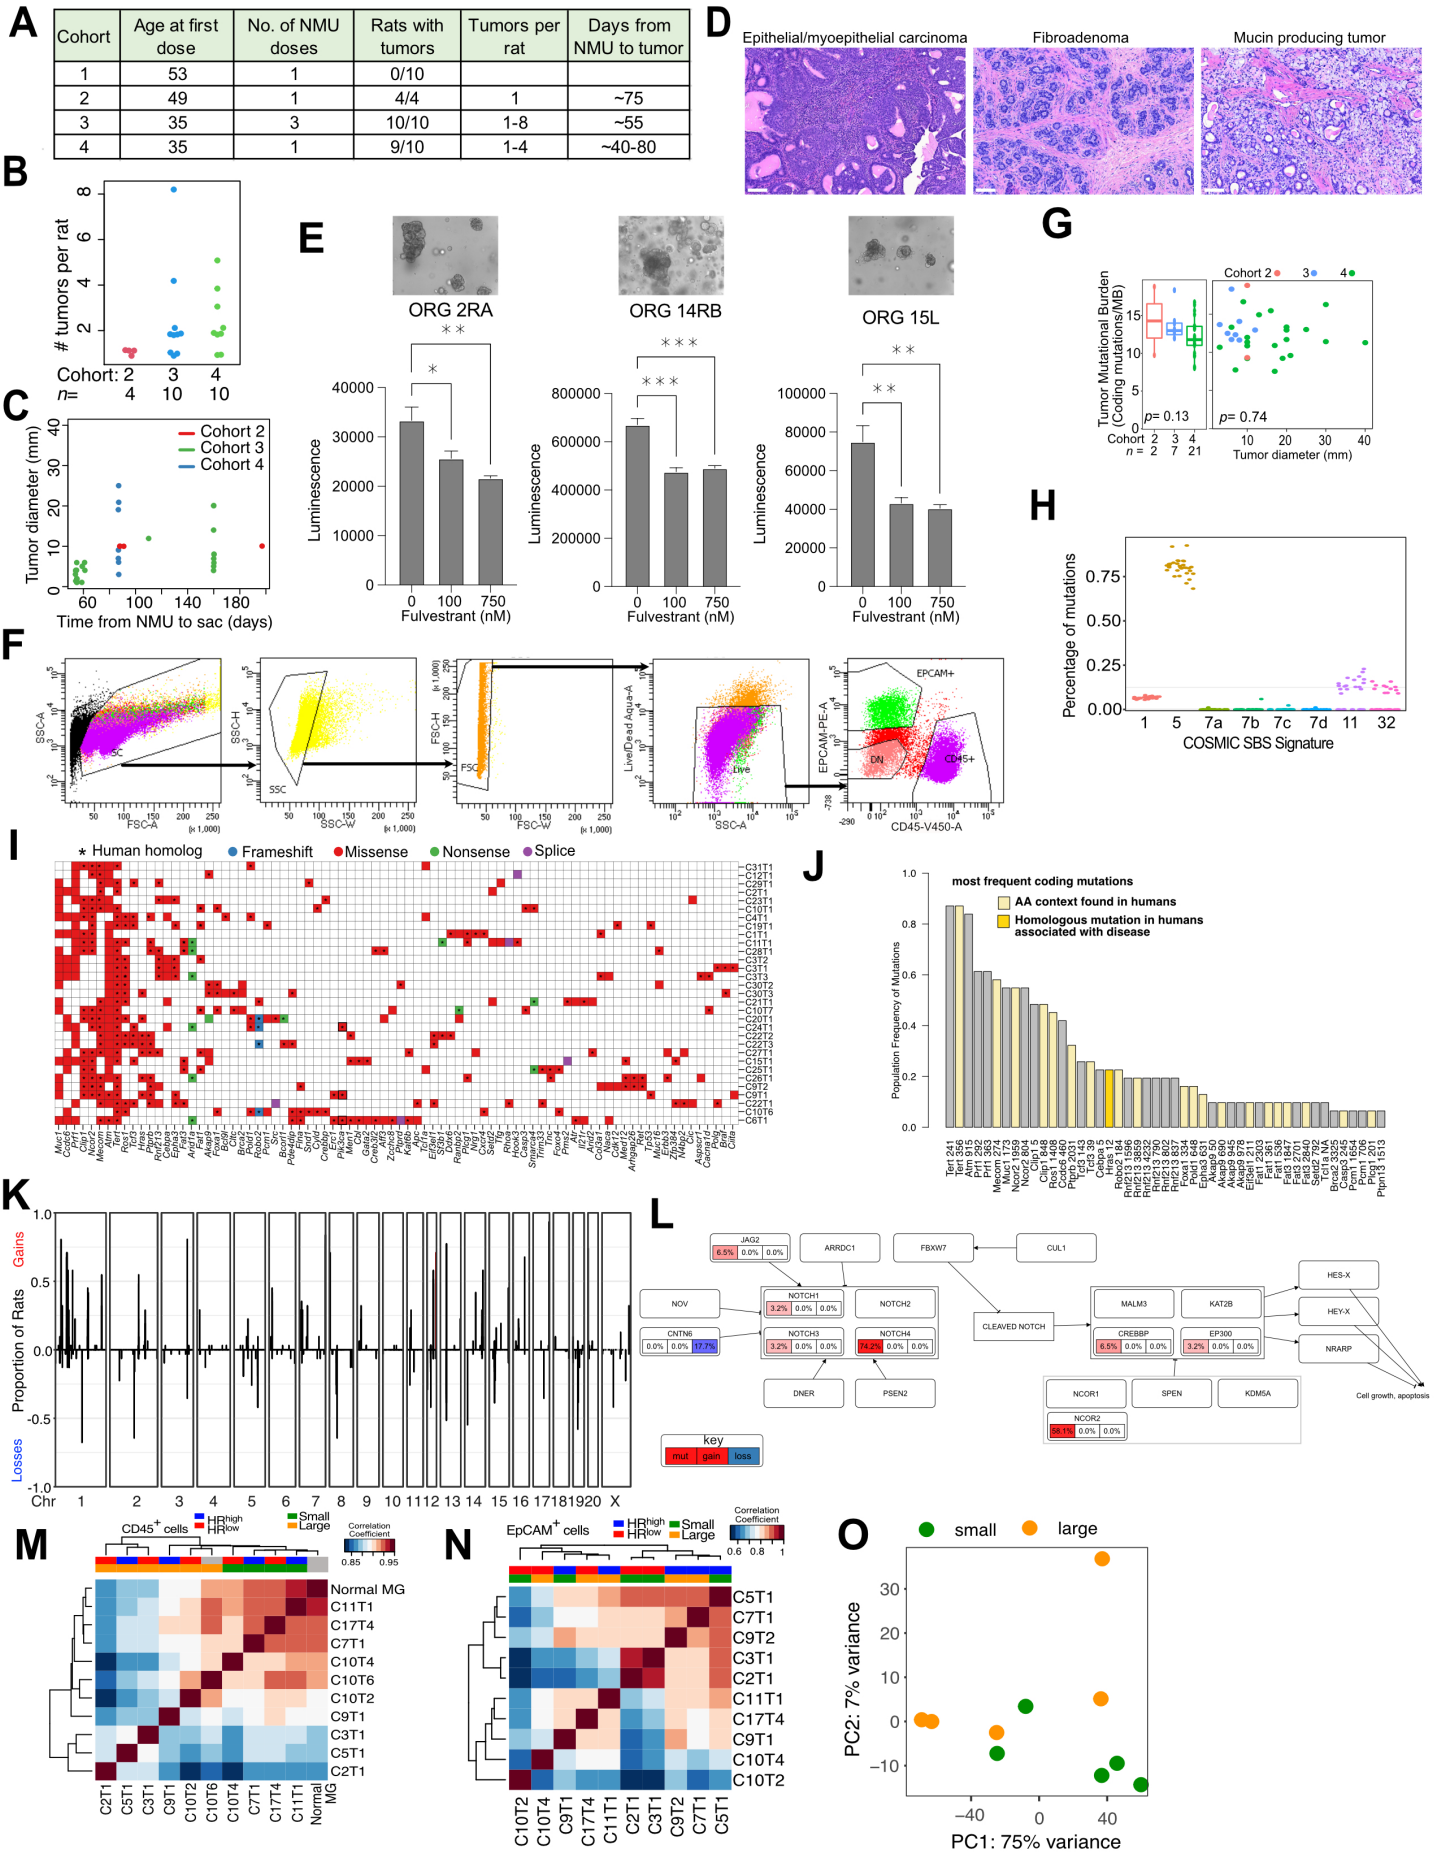

**Supplementary Figure S1. Molecular characterization of NMU-induced mammary tumors.** **A**, Summary of NMU treatment schedules, number of rats, and tumor latency and incidence. **B**, Number of tumors per rat. **C**, Variation in tumor diameter at time of collection after NMU-tumor induction. **D**, Hematoxylin-eosin staining of NMU-induced mammary tumors with different histology. **E** Representative images of organoid cultures (top) and graphs depicting luminescence signal of cultures treated with DMSO or fulvestrant. P-values were determined by One-way ANOVA with multiple comparisons tests. Representative results from n=2 experiments. **F**, Gating strategy used for FACS of EpCAM<sup>+</sup> tumor epithelial cells. SSC, side scatter, FSC, forward scatter. **G**, Total mutational burden association with cohort and size. Quartiles and range are shown. *p*-values calculated by Mann Whitney Wilcoxon test between cohort 3 and 4, and spearman correlation with size. **H**, Frequency of COSMIC SBS mutational signatures. **I**, Common mutations found in COSMIC genes. **J**, Most frequent coding mutations in the rat cohort. **K**, Genome-wide summary of the frequency of copy number variations in the rat characterization cohort. Gains and losses were defined as a log<sub>2</sub>(fold change) of  $\pm 0.3$ . **L**, Population frequency of genetic aberrations in NOTCH signaling pathway. **M-O**, Correlation between RNA-seq samples from CD45<sup>+</sup> (**M**) and EpCAM<sup>+</sup> (**N**) cell populations. Red and blue indicates HR<sup>low</sup> and HR<sup>high</sup> tumor, respectively. Green and orange marks small and large tumor, respectively. **O**, Principal component analysis of RNA-seq data of EpCAM<sup>+</sup> tumor cells from small and large tumors.

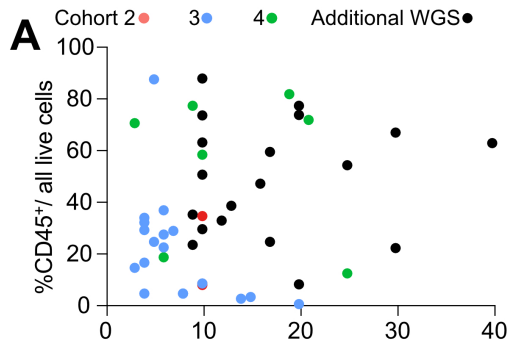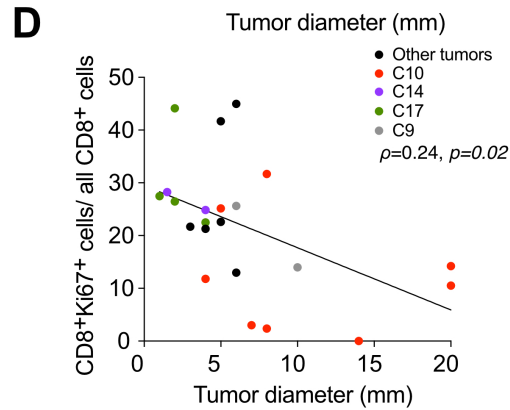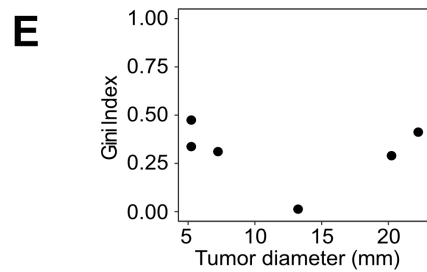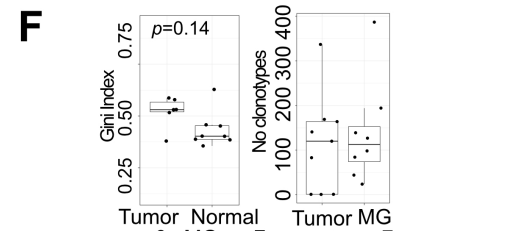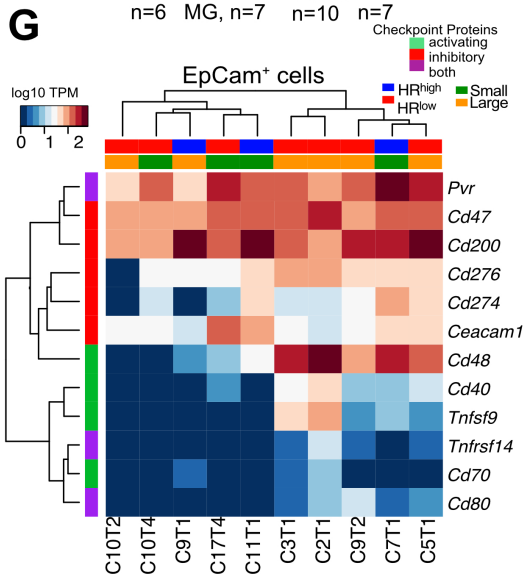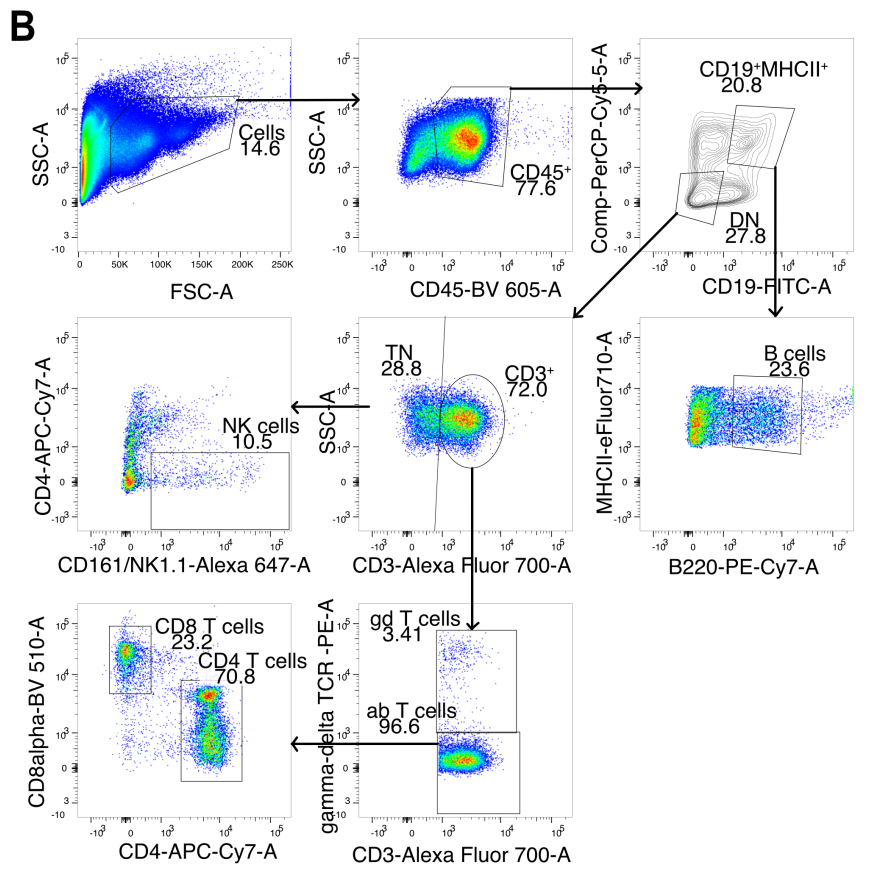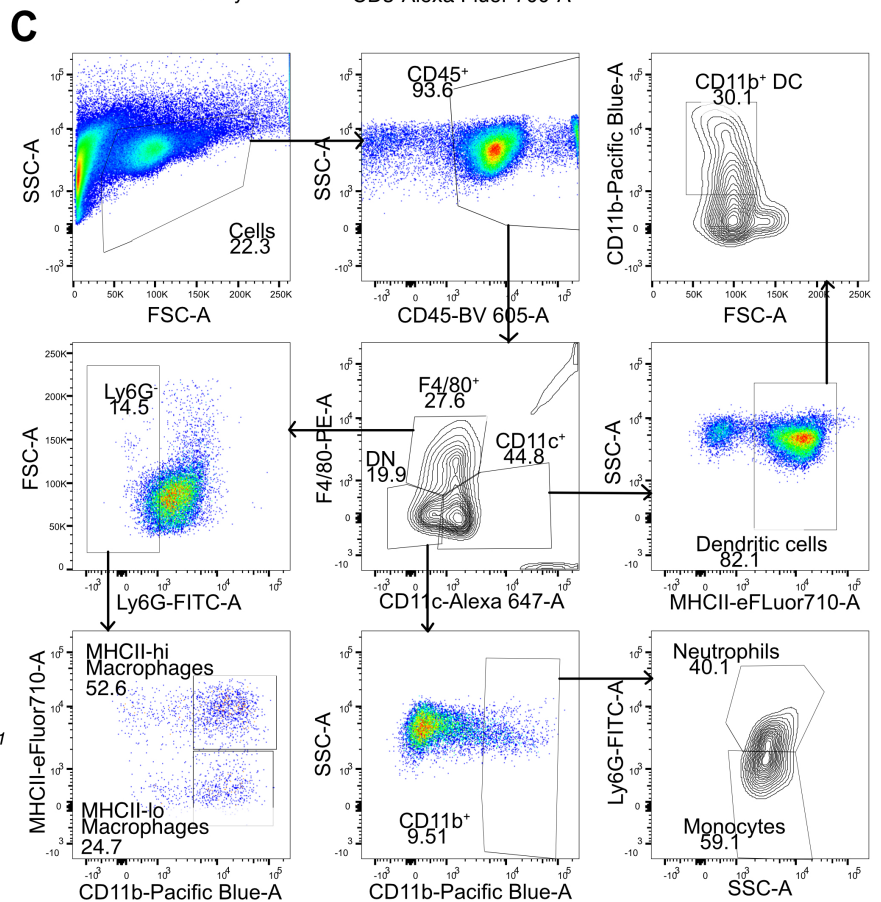

**Supplementary Figure S2. The immune environment of NMU-induced mammary tumors.** Red and blue indicates HR<sup>low</sup> and HR<sup>high</sup> tumor, respectively. Green and orange marks small and large tumors, respectively. **A**, Abundance of the CD45<sup>+</sup> cell population in tumors by FACS. **B-C**, Gating strategy used for polychromatic FACS to quantify the relative abundance of major cell types contributing to adaptive (**B**) and innate immunity (**C**). SSC, side scatter. FSC, forward scatter. DN, double negative. **D**, Correlation between the frequency of Ki67<sup>+</sup>CD8<sup>+</sup> T cells determined by immunofluorescence and tumor diameter. For animals with multiple tumors, the tumors are shown in the same color. Animals that have just one tumor are shown in black. **E**, Correlation between BCR Gini index and tumor size. **F**, TCR Gini index and number of unique clonotypes in CD45<sup>+</sup> cells from tumors and mammary glands **G**, Heatmap of log<sub>10</sub>TPM counts of immune checkpoint genes in EpCAM<sup>+</sup> tumor cells.



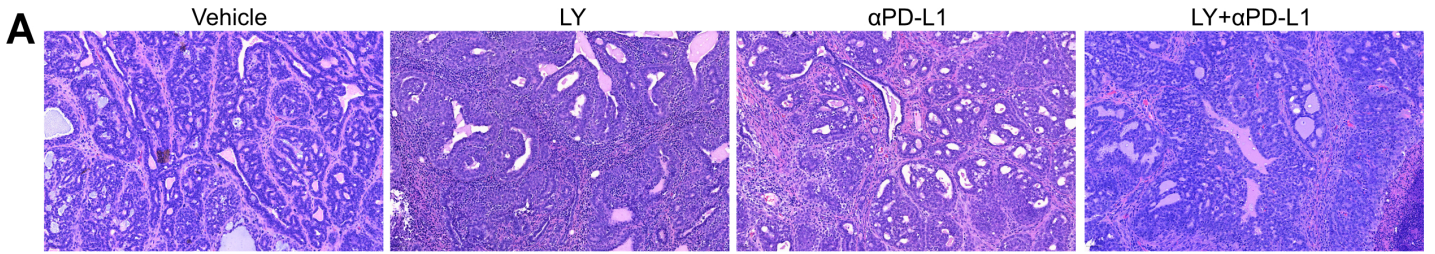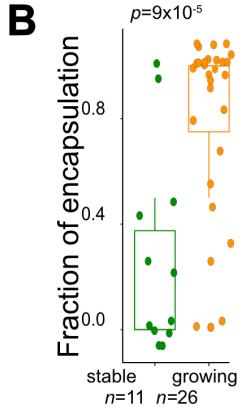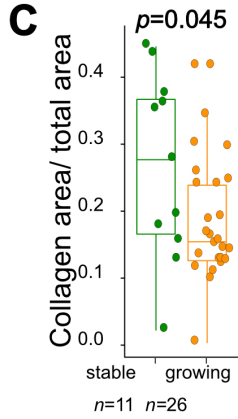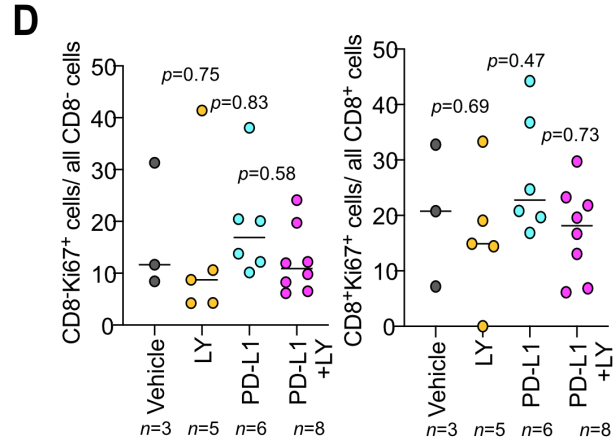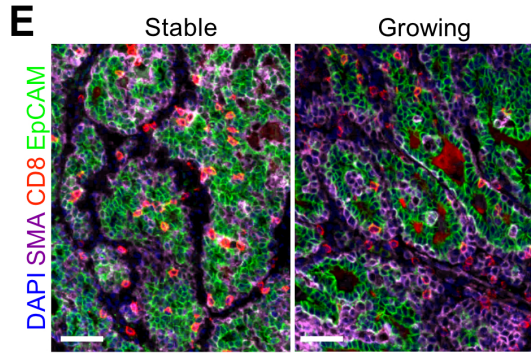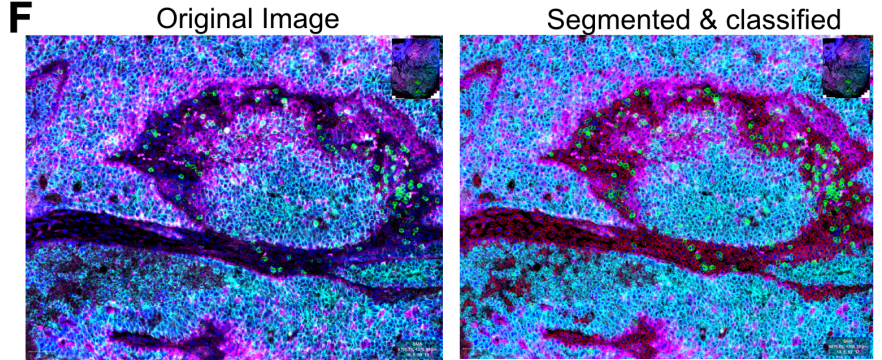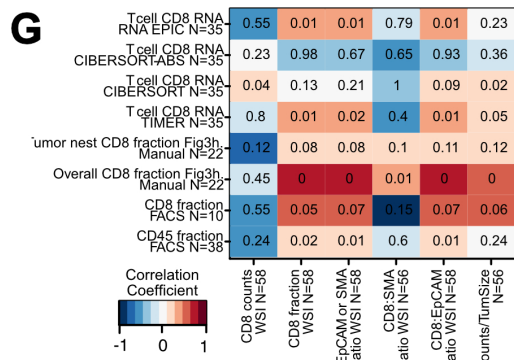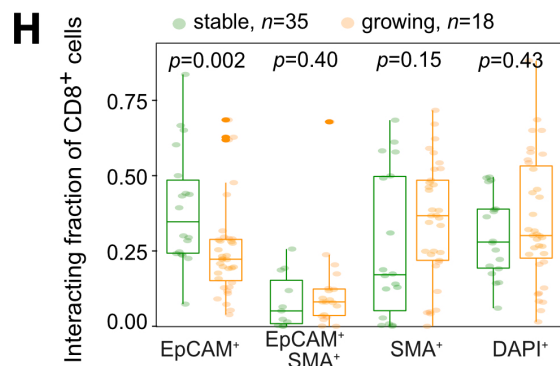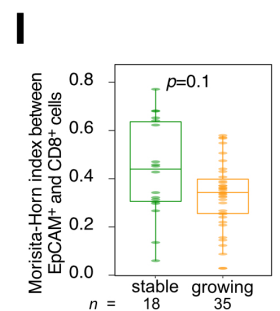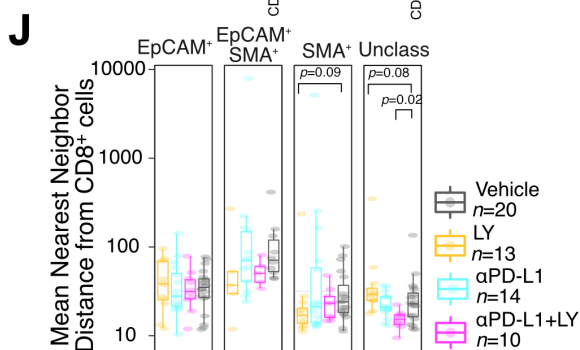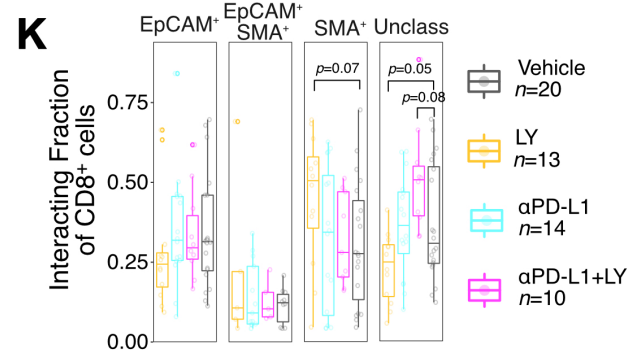

**Supplementary Figure S4. Microenvironmental analysis of NMU-induced tumors following immunotherapy.** **A**, Representative pictures of H&E staining of tumors from different treatment groups. **B**, Fraction of encapsulation determined by manual semi-quantitative scoring of trichrome stained slides in growing and stable tumours. Shown are quartiles and range.  $p$ -values calculated using Mann Whitney Wilcoxon test. **C**, Quantification of collagen content in stable and growing tumors based on trichrome staining. Shown are quartiles and range.  $p$ -values calculated using Mann Whitney Wilcoxon test. **D**, Quantification of Ki67 in CD8<sup>-</sup> and CD8<sup>+</sup> cell populations based on immunofluorescence. Shown are quartiles and range.  $p$ -values calculated using Mann Whitney Wilcoxon test. **E**, Representative fields from whole slide scanning of immunofluorescence analysis of DAPI, SMA, CD8, and EpCAM in growing and stable tumors, scale bar, 100  $\mu$ m. **F**, Example of automatic segmentation and classification of whole slide images (WSI) of immunofluorescence for SMA, CD8, and EpCAM. **G**, Correlation between WSI and other techniques including manual counting, FACS, and RNA-seq-based deconvolution. Color scale bar depicts Spearman correlation coefficient and numbers shown are corresponding  $p$ -values. **H**, Fraction of CD8<sup>+</sup> T cells within 15 $\mu$ m of indicated cell types stratified according to growth status. **I**, Morisita-Horn index between CD8<sup>+</sup> and EpCAM<sup>+</sup> cells in a 200  $\mu$ m matrix. Quartiles and range are shown.  $p$ -values were calculated using the Mann Whitney Wilcoxon test. **J-K**, Spatial analysis between CD8<sup>+</sup> T cells and all other cell types stratified according to treatment. Quartiles and range are shown.  $p$ -values calculated by Wilcoxon-rank sum test. **(J)**, Nearest neighbor distances. **(K)**, Fraction of CD8<sup>+</sup> T cells within 15 $\mu$ m.

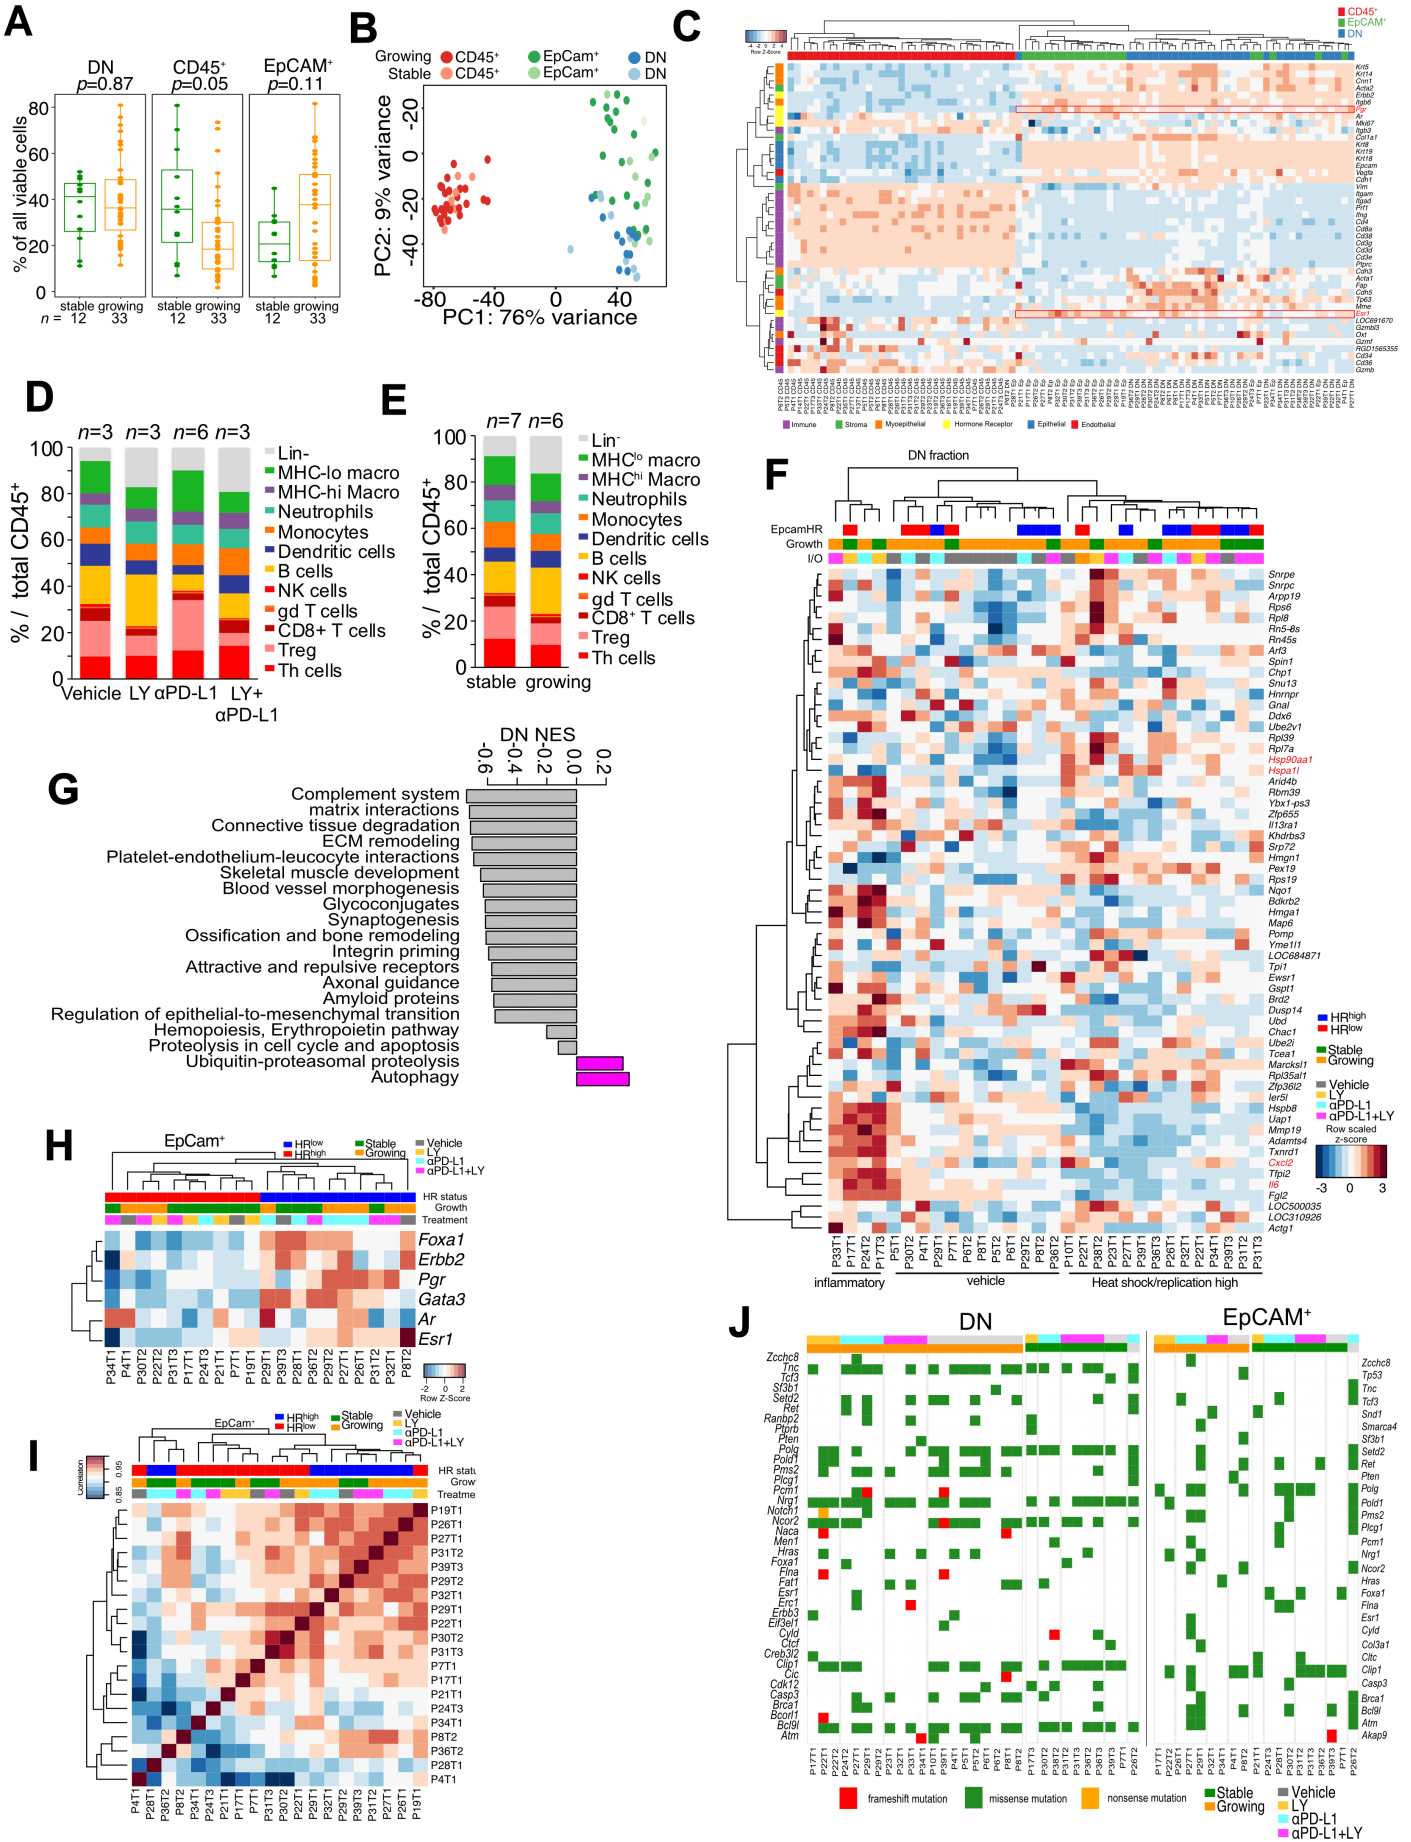



**Supplementary Figure S5. Molecular profiling of immunotherapy treated tumors.** **A**, Frequencies of the indicated cell types determined by FACS in growing and stable tumors. Shown are quartiles and range. P-values calculated using Mann Whitney Wilcoxon test. **B**, Principal component analysis of CD45<sup>+</sup>, EpCAM<sup>+</sup>, and DN cell populations profiled by RNA-seq. **C**, Heatmap of row-normalized Z-scores of genes differentiating CD45<sup>+</sup>, EpCAM<sup>+</sup>, and DN cell populations. *Esr1* and *Pgr* is highlighted in red. **D-E**, Leukocyte composition of tumors by polychromatic flow cytometry classified by treatment (**D**) or by growth status (**E**). **F**, Heatmap of row-normalized Z-scores of differentially expressed genes between vehicle and all immunotherapy-treated tumors in the DN cell population. **G**, Normalized GSEA enrichment scores of significantly enriched pathways in vehicle vs. LY+PD-L1 treated DN cells. Gray and violet bars depict pathways enriched in vehicle and LY+PD-L1 tumors, respectively. **H**, Row-normalized Heatmap of HR-related genes including luminal transcription factors. **I**, Spearman correlations between EpCAM<sup>+</sup> RNA-seq samples. **J**, Common cancer mutations in RNA-seq from in EpCAM<sup>+</sup> and DN cells. Red and blue color indicates HR<sup>low</sup> and HR<sup>high</sup> tumors, respectively. Green and orange color marks stable and growing tumors, respectively.



**Supplementary Figure S6. Characterization of EpCAM<sup>+</sup> specific differences between stable and growing tumors.** Red and blue designation represents HR<sup>low</sup> and HR<sup>high</sup> tumors, respectively. Green and orange color marks stable and growing tumors, respectively. **A**, Growth curves of inflammatory tumors. **B**, Row-normalized heatmap of inflammation-related genes in the EpCAM<sup>+</sup> cell population. **C**, Enriched pathways in HR<sup>high</sup> growing vs. stable tumors. Node size indicates the number of genes within the pathway, line width reflects the number of shared genes between two gene sets. **D**, Disease-free survival plots of TCGA basal, HER2, and LumB breast cancer patients segregated by the “Luminal growing” gene signature. Dark, medium, and light curves represent terciles with high, medium, and low expression of the signature, respectively. Hazard Ratio and 95% confidence interval were computed by modeling the signature score as a continuous variable in a cox model accounting for stage. *P*-values were calculated using log-rank test. **E**, Volcano plot of genes differentially expressed in the TCGA Luminal A tumors with high or low expression the “Luminal-growing” rat tumor gene signature. Selected immune-related genes in red have a [Log2 fold change]>1.5 and adjusted p-value<0.05. **F**, Pathways enriched in TCGA LumA with high and low expression of the “Luminal-growing” signature. Node size indicates the number of genes within the pathway, line width reflects the number of shared genes between two gene sets. **G**, Kaplan Meier plots of overall survival segregated by high and low “Luminal-growing” signature in an ER<sup>+</sup> metastatic breast cancer cohort treated with eribulin+pembrolizumab or eribulin alone. Low and high arms dichotomized using the median value and used in a univariate cox model to report Hazards ratio with 95% confidence intervals. *P*-values calculated using log-rank test.

## SUPPLEMENTARY TABLES

**Supplementary Table S1.** Description of antibodies used.

**Supplementary Table S2.** Description of animals used for characterisation and immunotherapy cohorts.

**Supplementary Table S3.** Coding mutations in NMU cohort as profiled by whole genome sequencing.

**Supplementary Table S4.** List of differentially expressed genes across different comparisons. Gene Set Enrichment Analysis of DGE results. Gene signature associated with tumor growth or progression in HR<sup>high</sup> tumors.
